# Supplementary material for: Activated innate lymphoid cell populations accumulate in human tumour tissues
Source: Springer Nature journal article supplement (doi:10.1186/s12885-018-4262-4), 2018-03-27
Supplement: MOESM1 [file 15571276]

Supplemental Figure 1

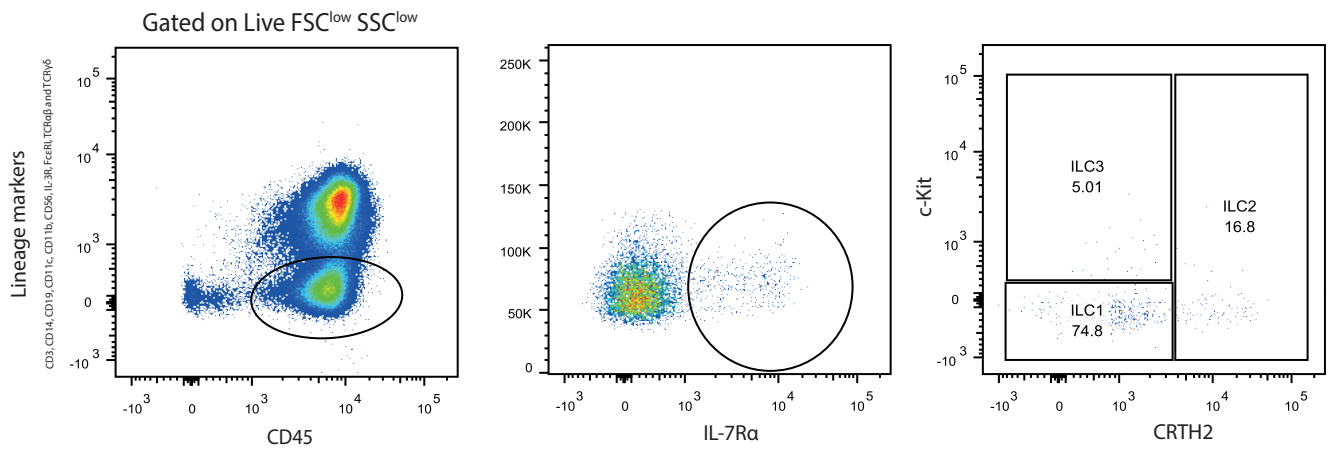

Representative staining of ILC populations. ILC were gated on lineage negative, CD45<sup>+</sup>, CD127<sup>+</sup> cells and based on the expression of CRTH2 and c-Kit divided into ILC1 (CRTH2<sup>-</sup>, c-Kit<sup>-</sup>), ILC2 (CRTH2<sup>+</sup>, c-Kit<sup>+/-</sup>) and ILC3 (CRTH2<sup>-</sup>, c-Kit<sup>+</sup>).

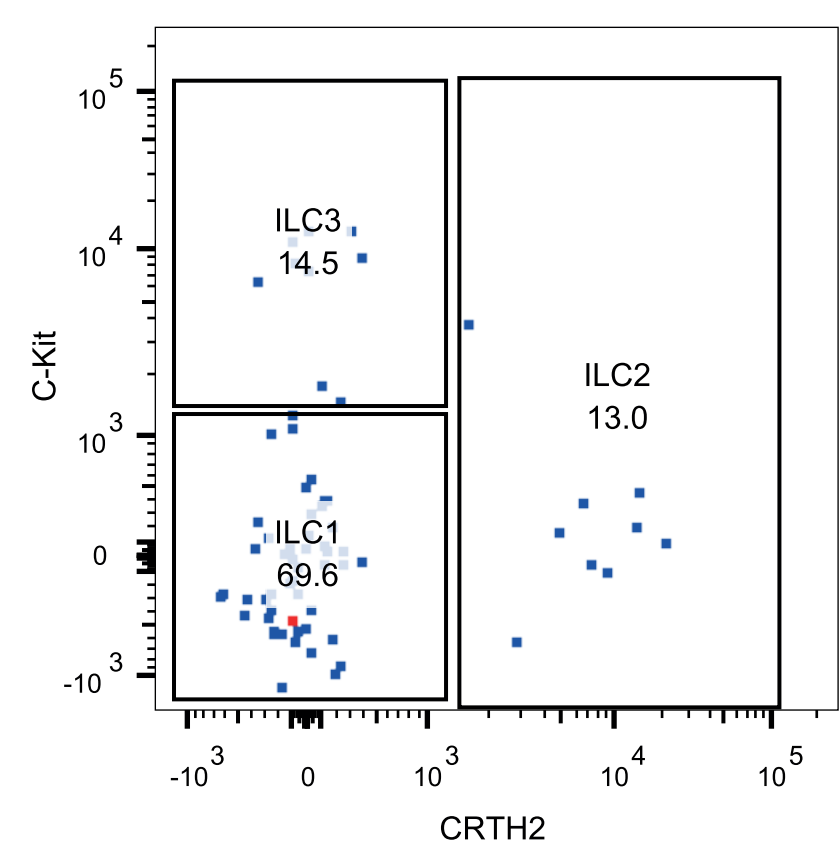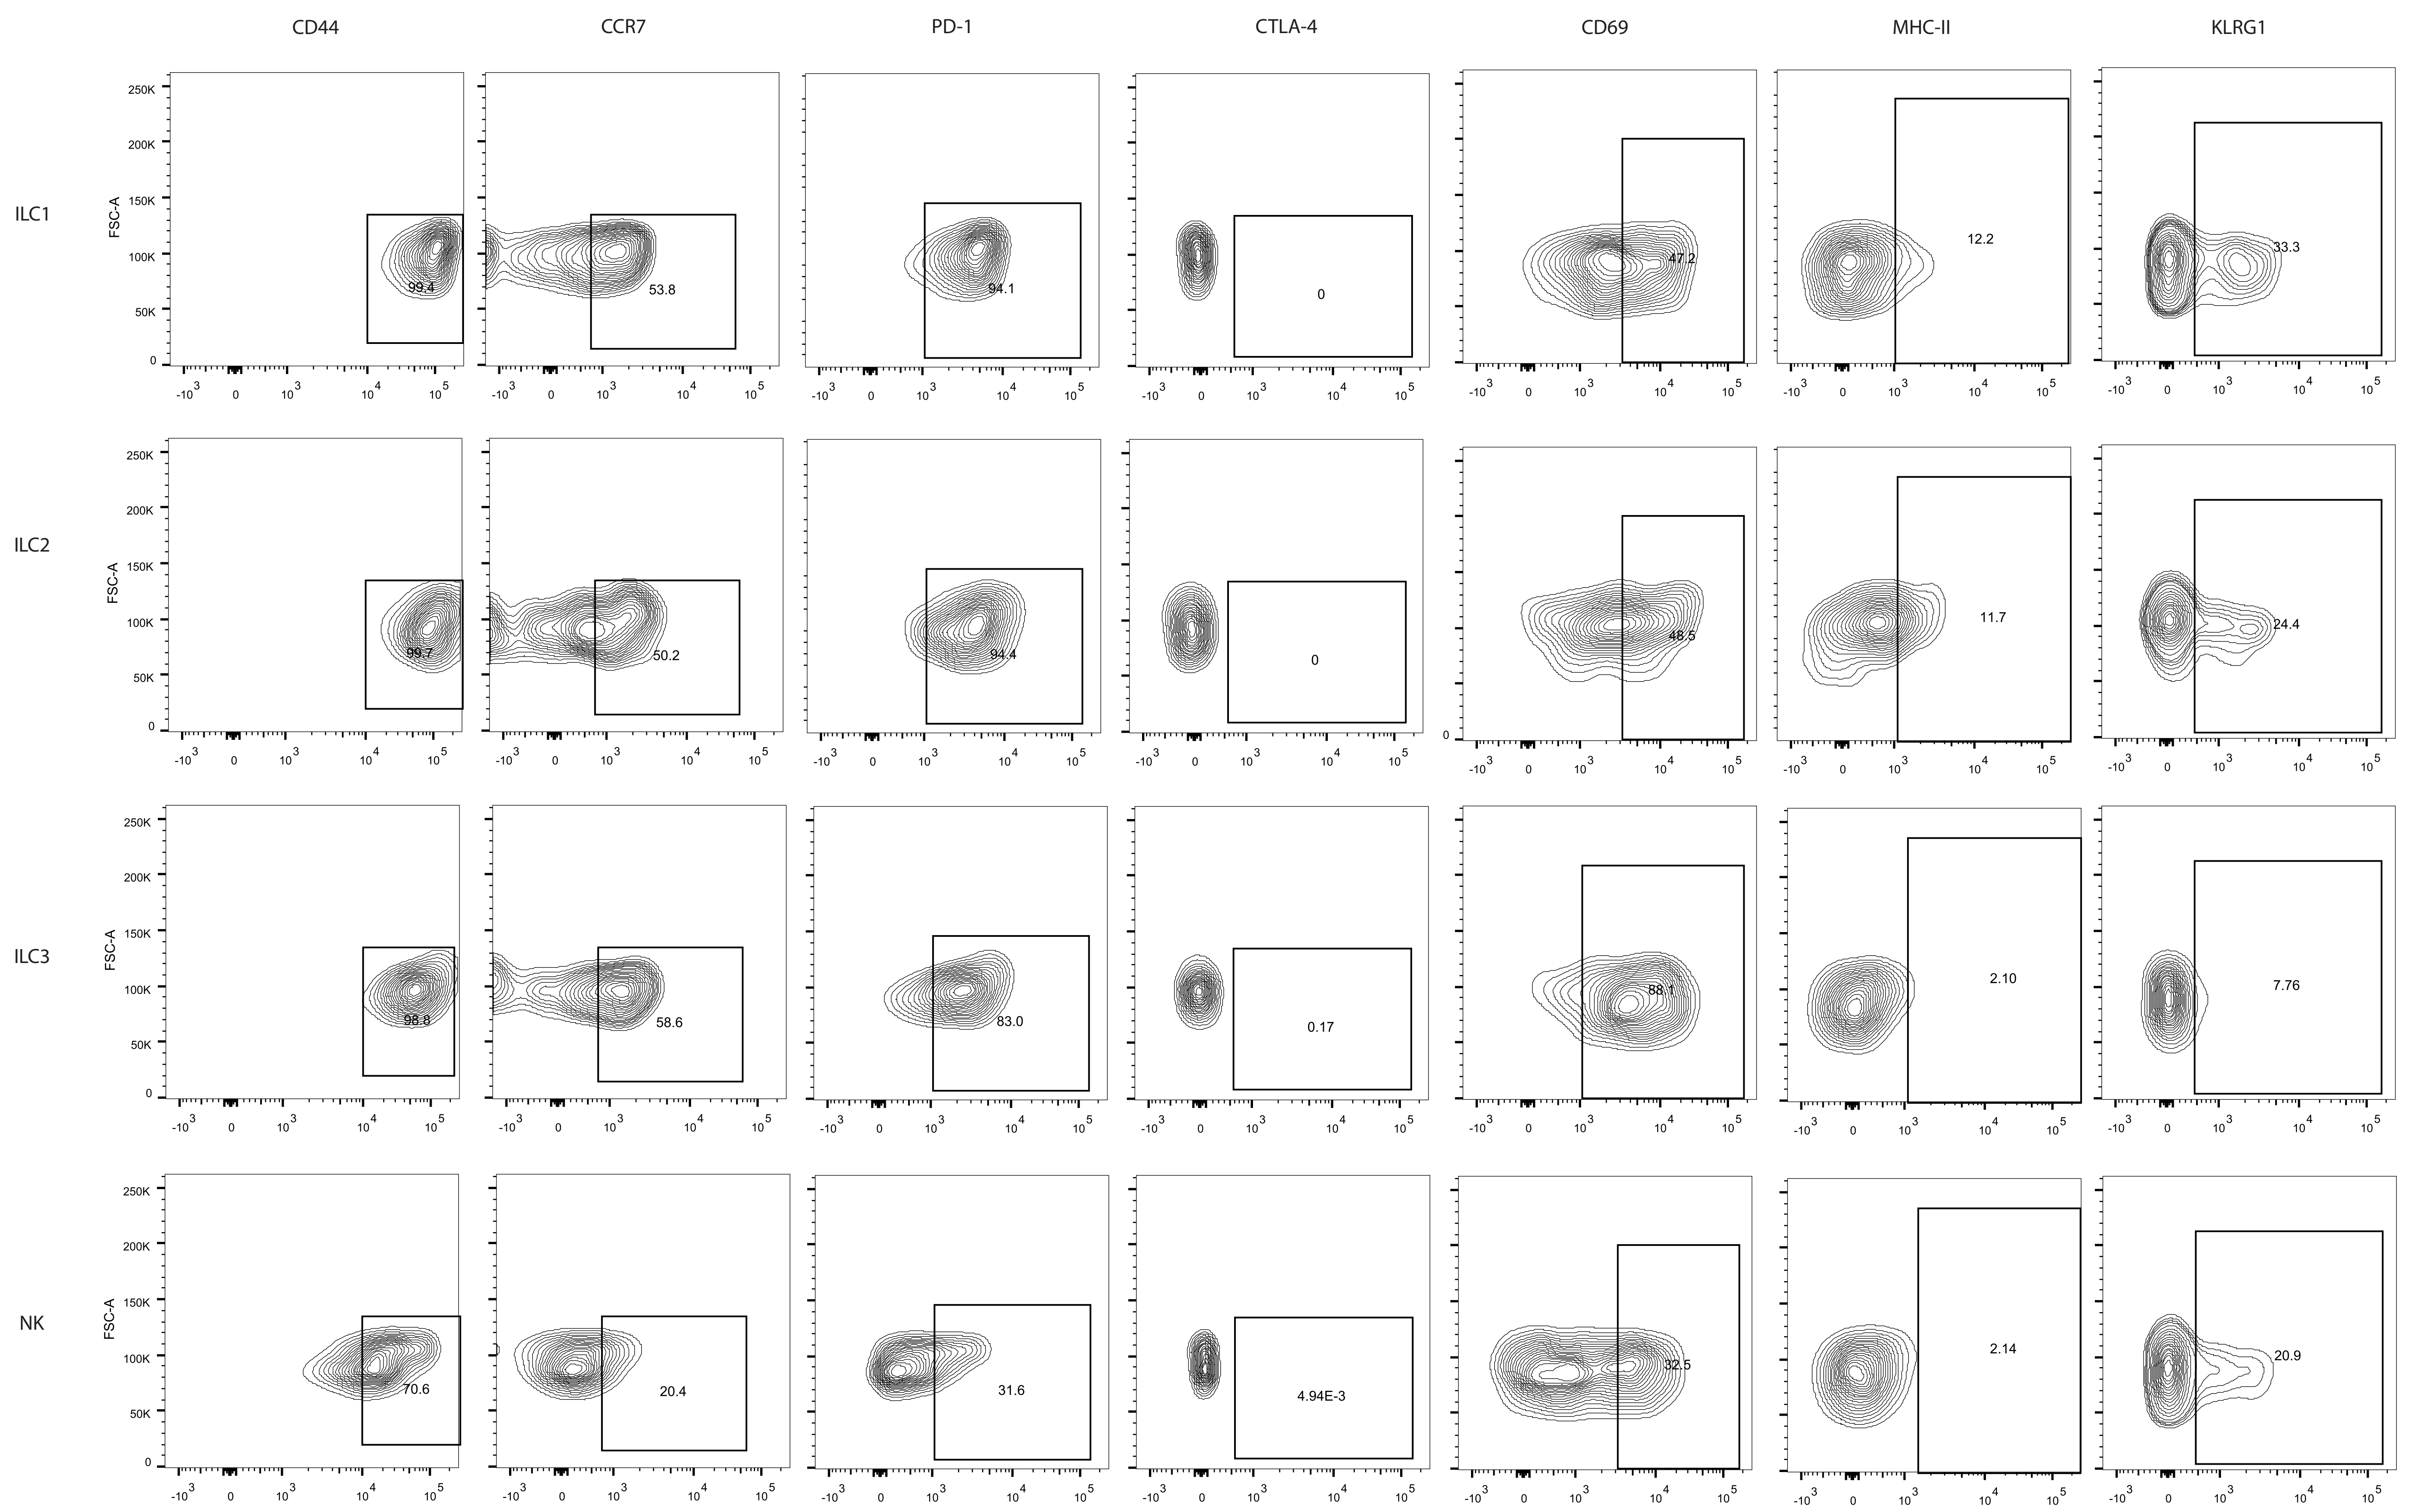

Supplemental Figure 2. Representative example of ILC1, ILC2, ILC3 phenotypic analysis from benign breast tissue.

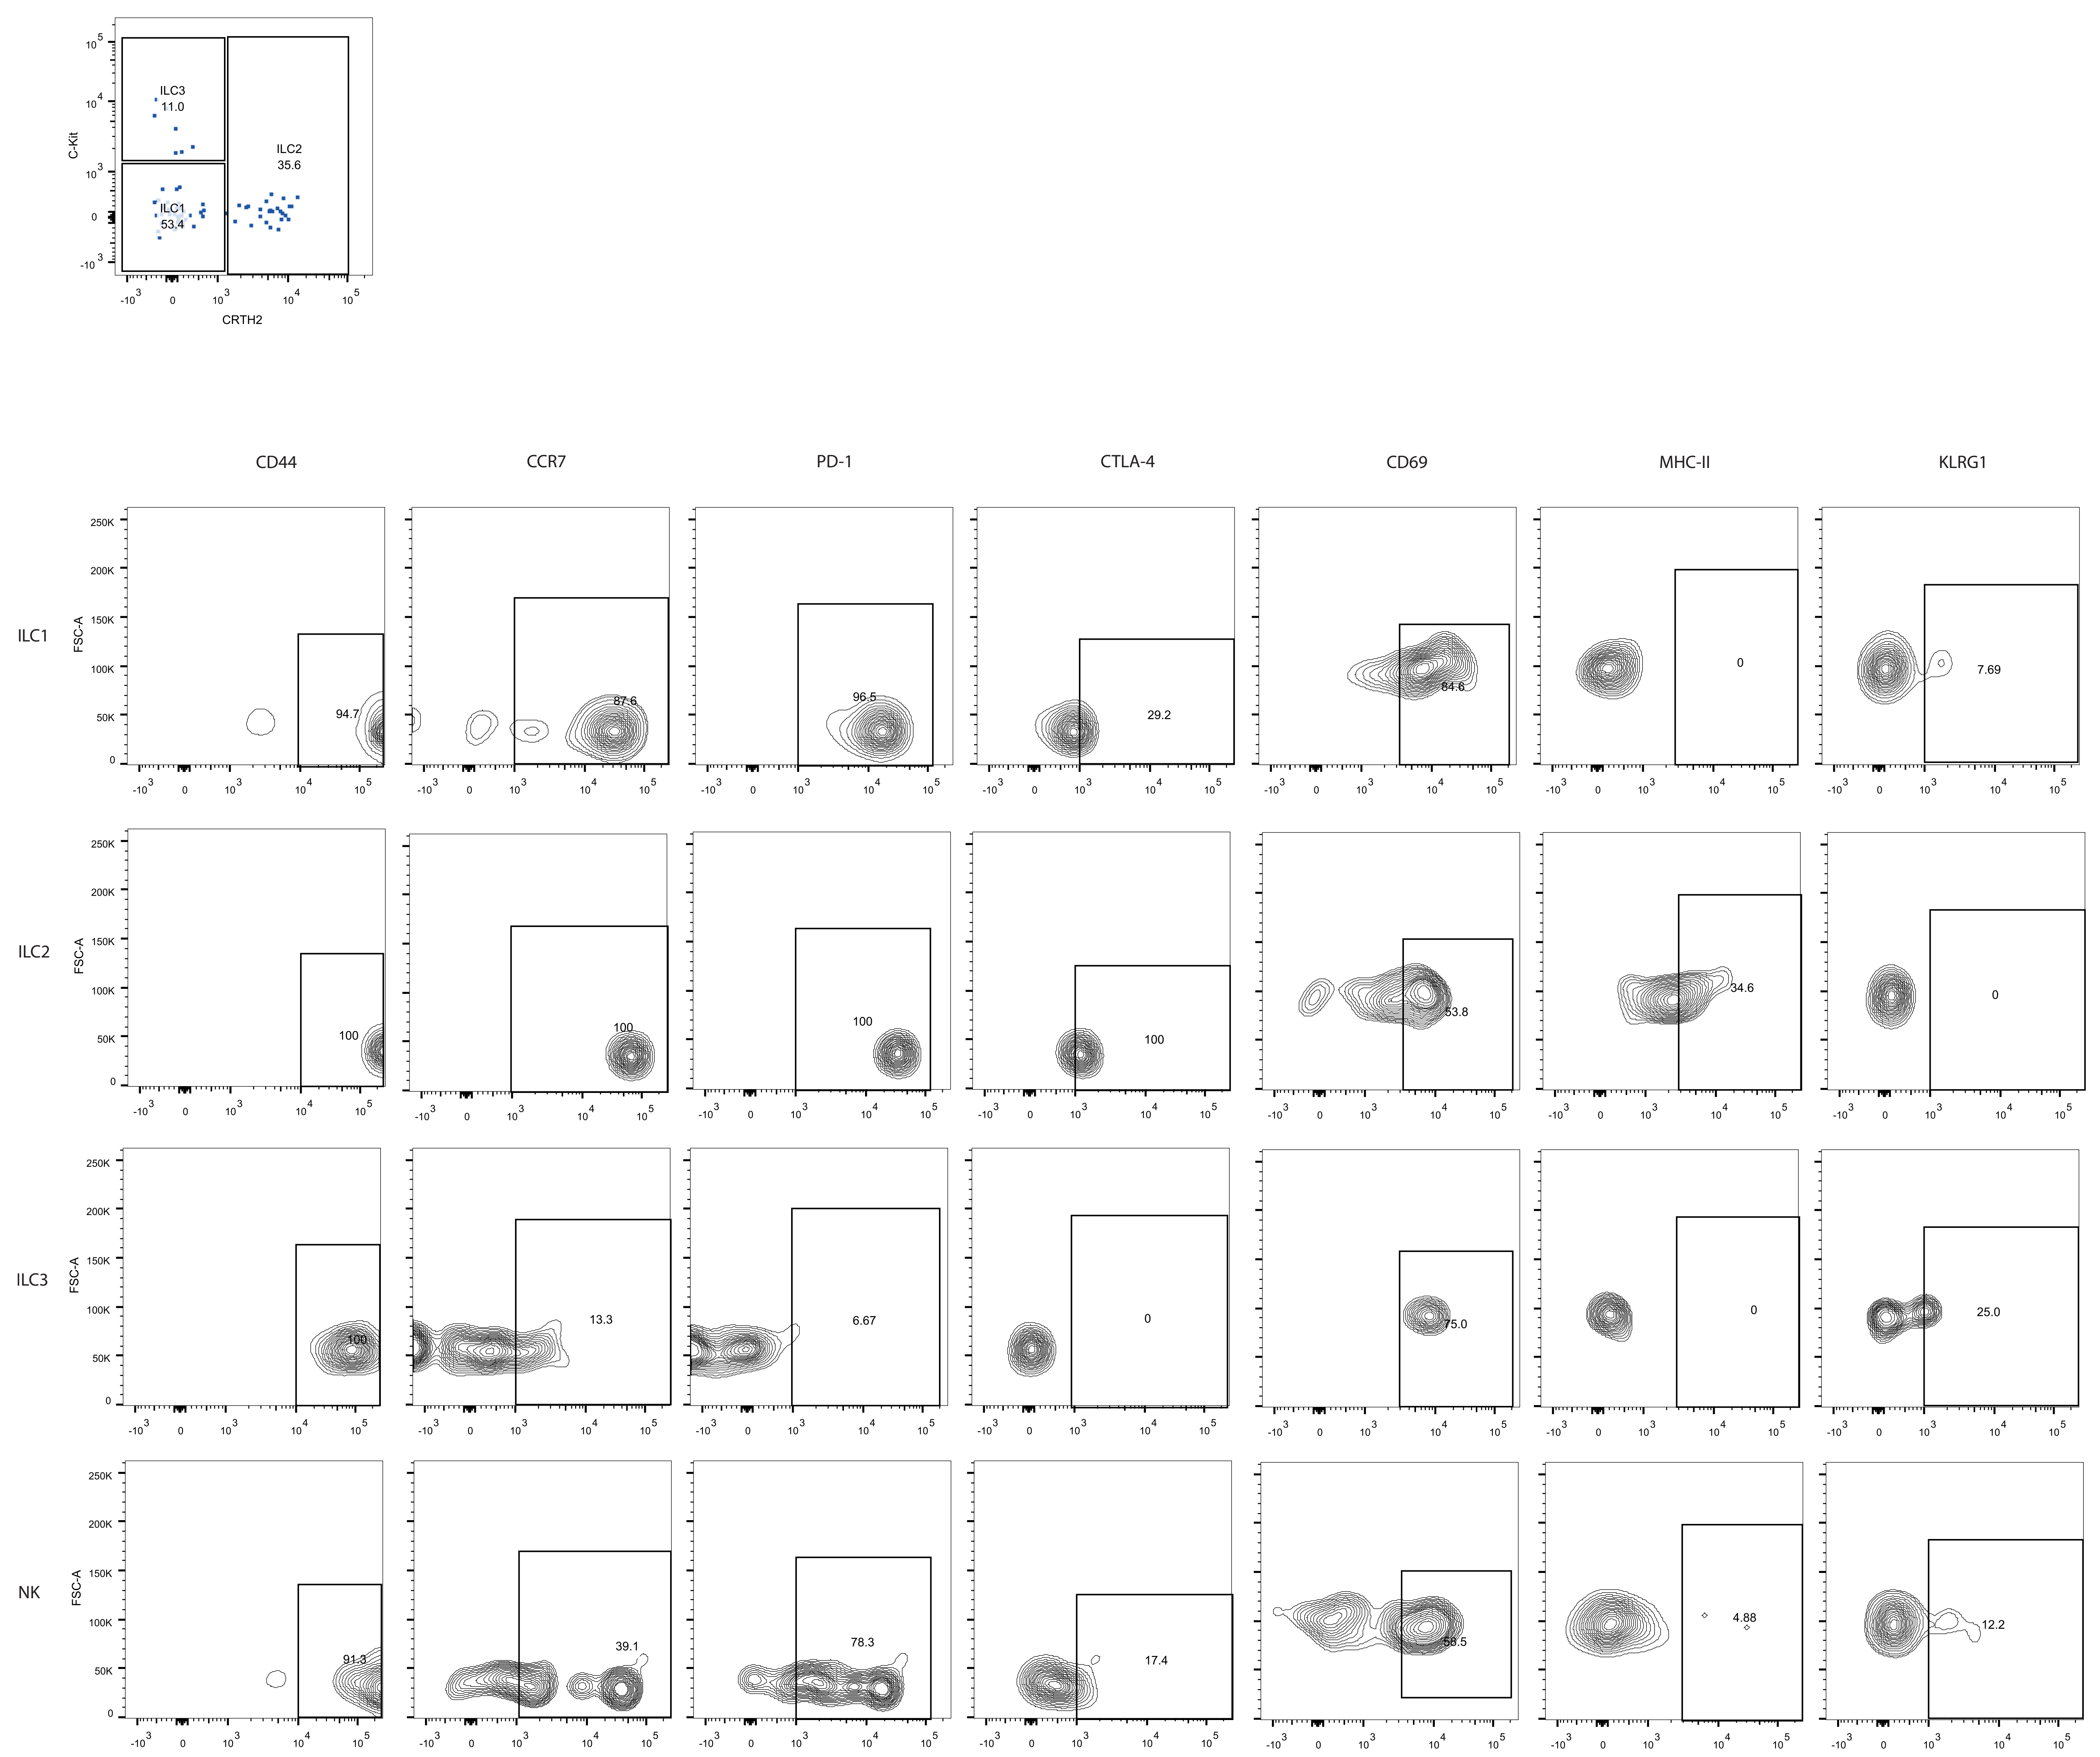

Supplemental Figure 3. Representative example of ILC1, ILC2, ILC3 phenotypic analysis from malignant breast tissue.



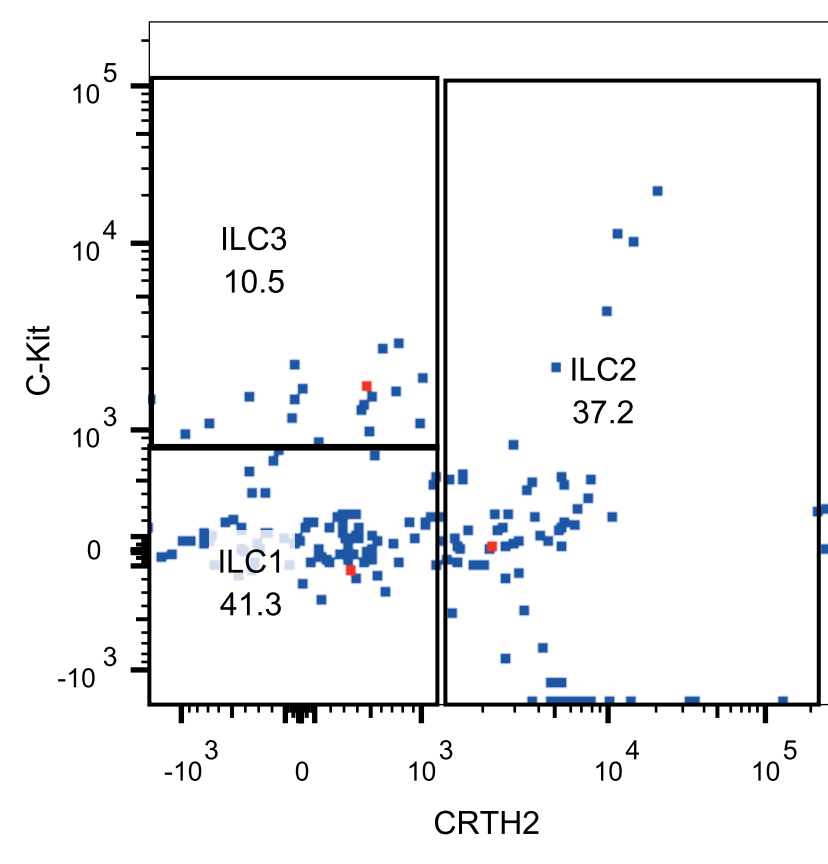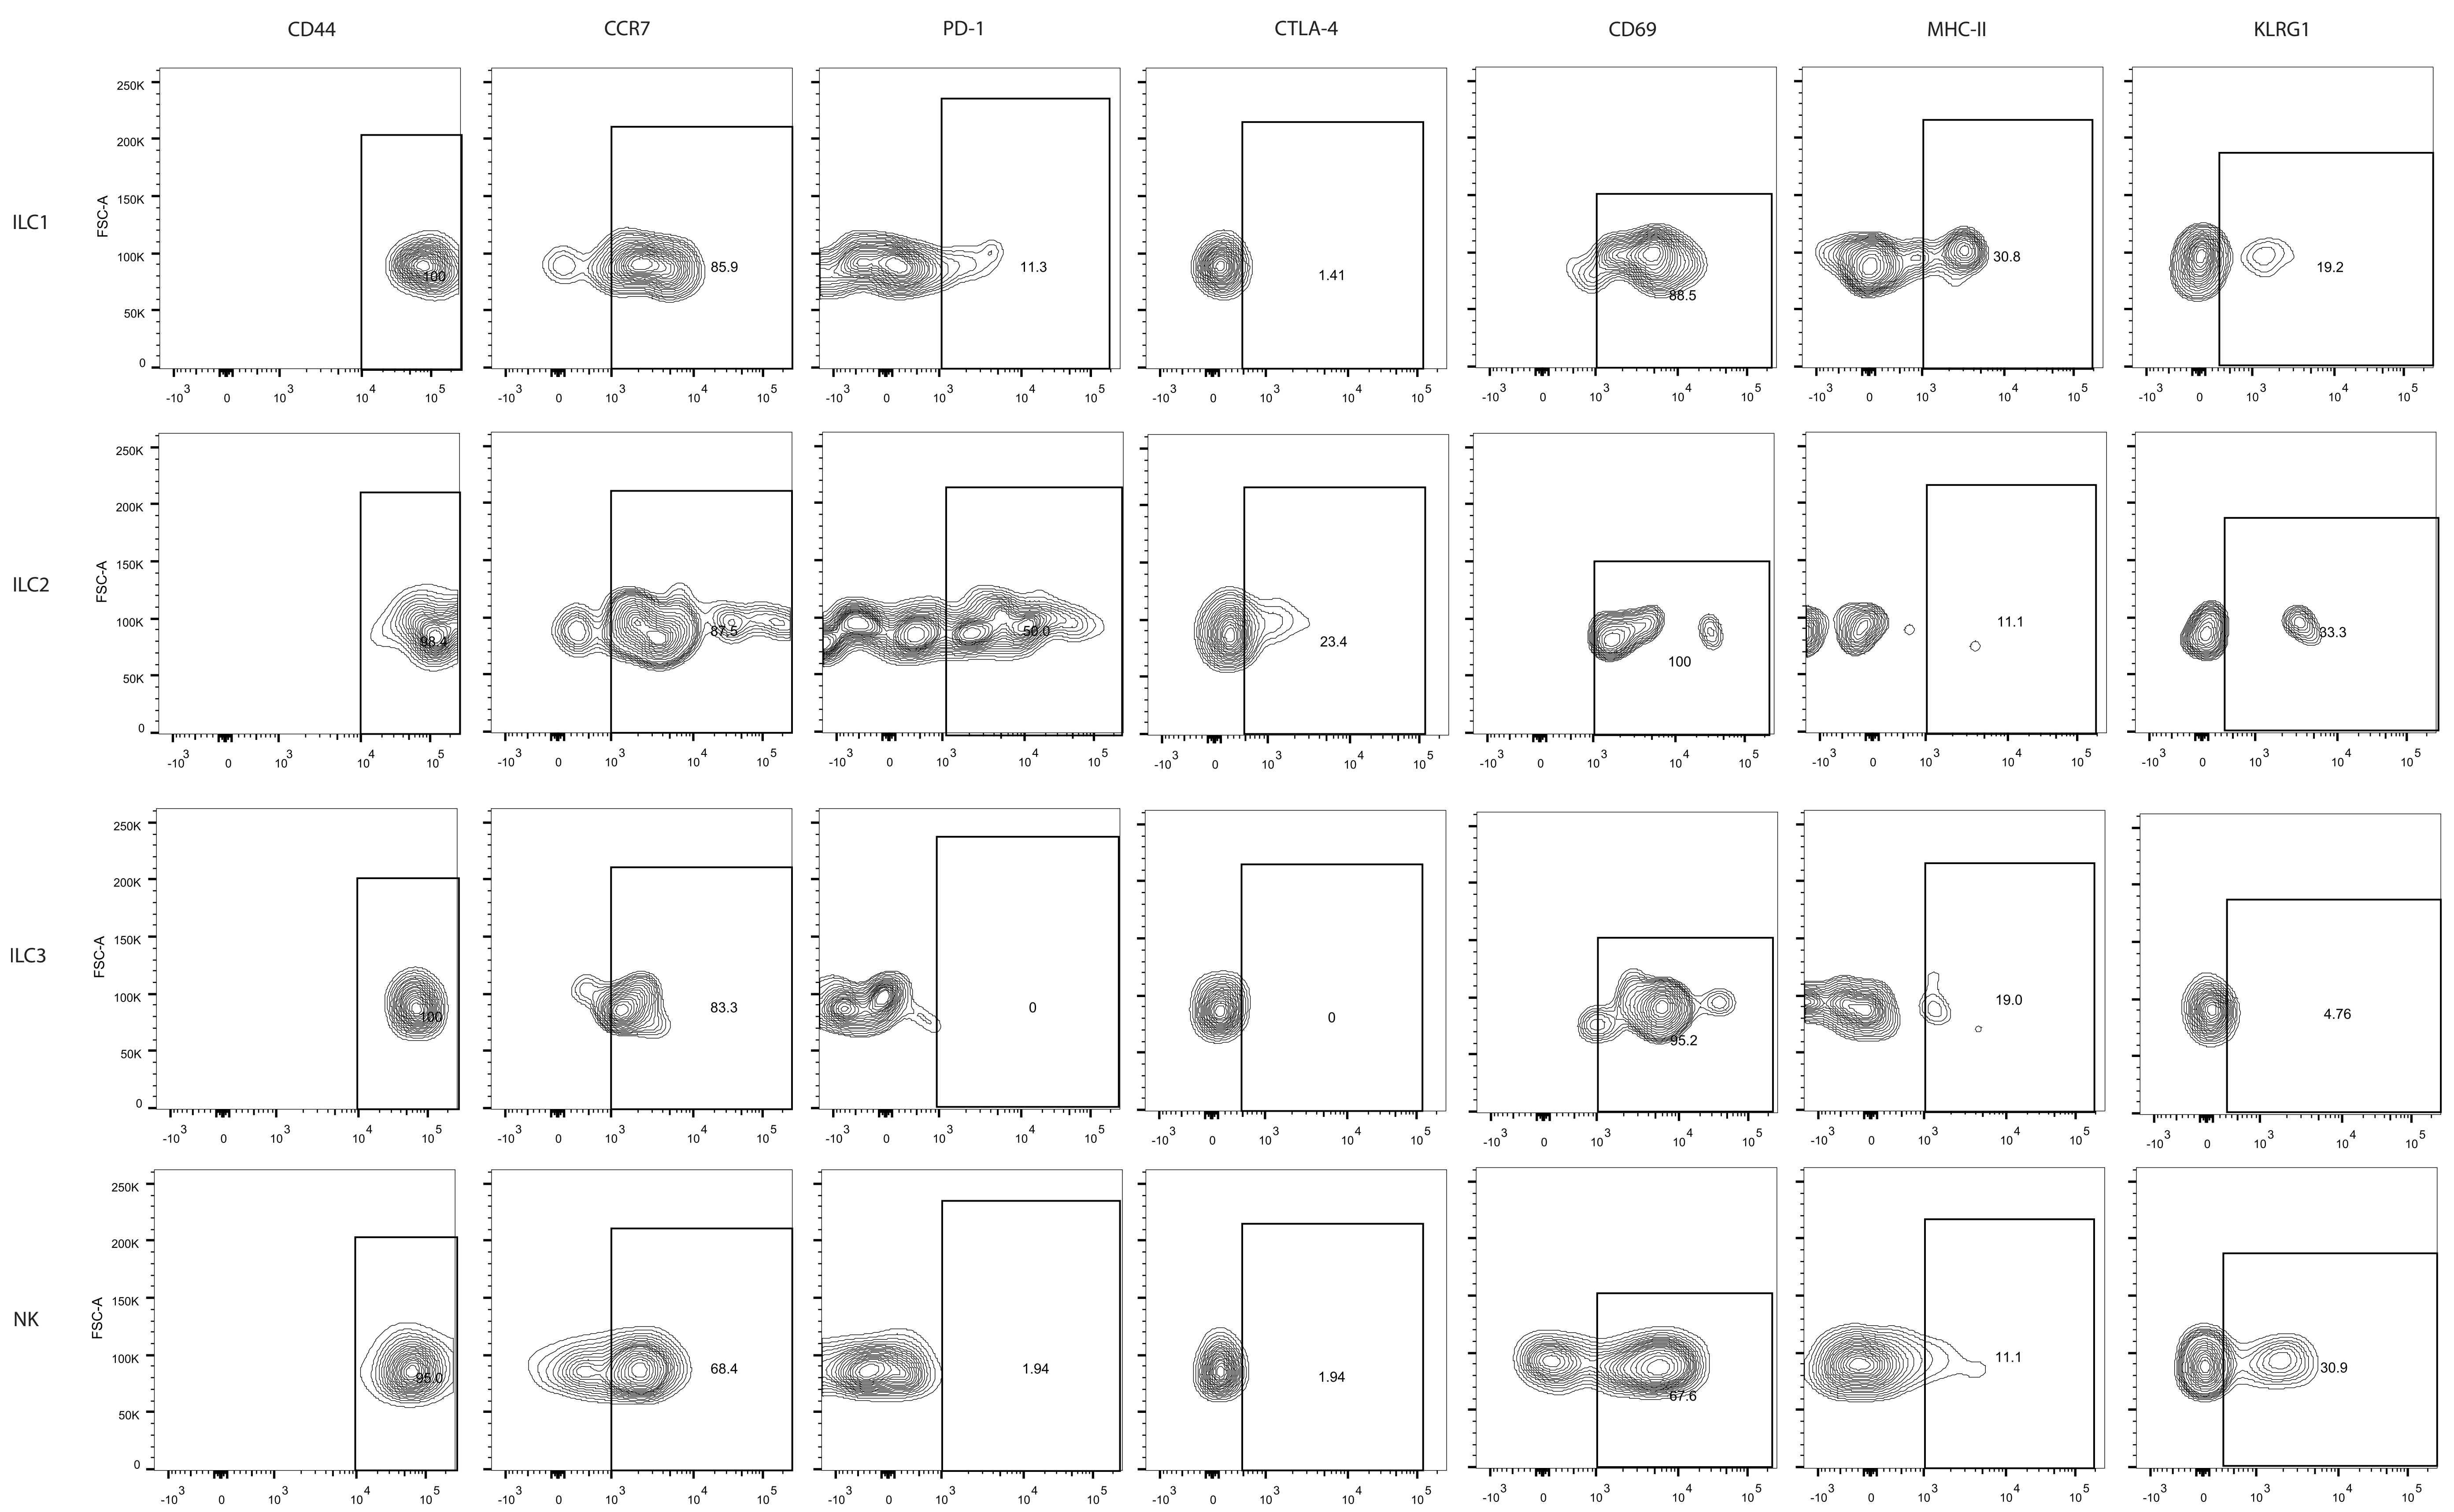

Supplemental Figure 4. Representative example of ILC1, ILC2, ILC3 phenotypic analysis from malignant GI tumour tissue.

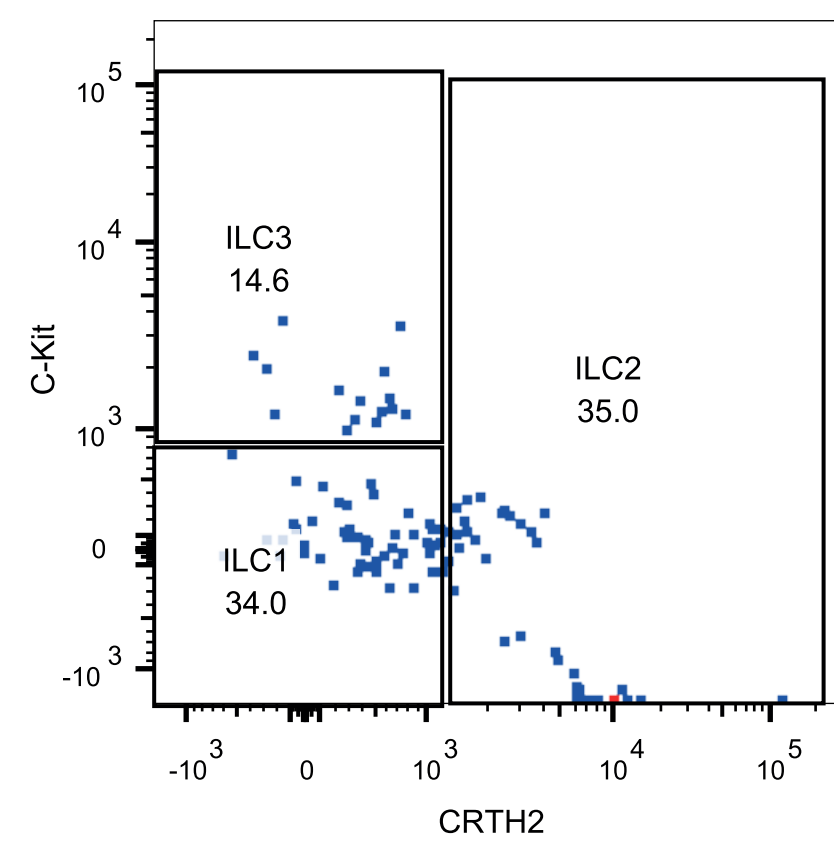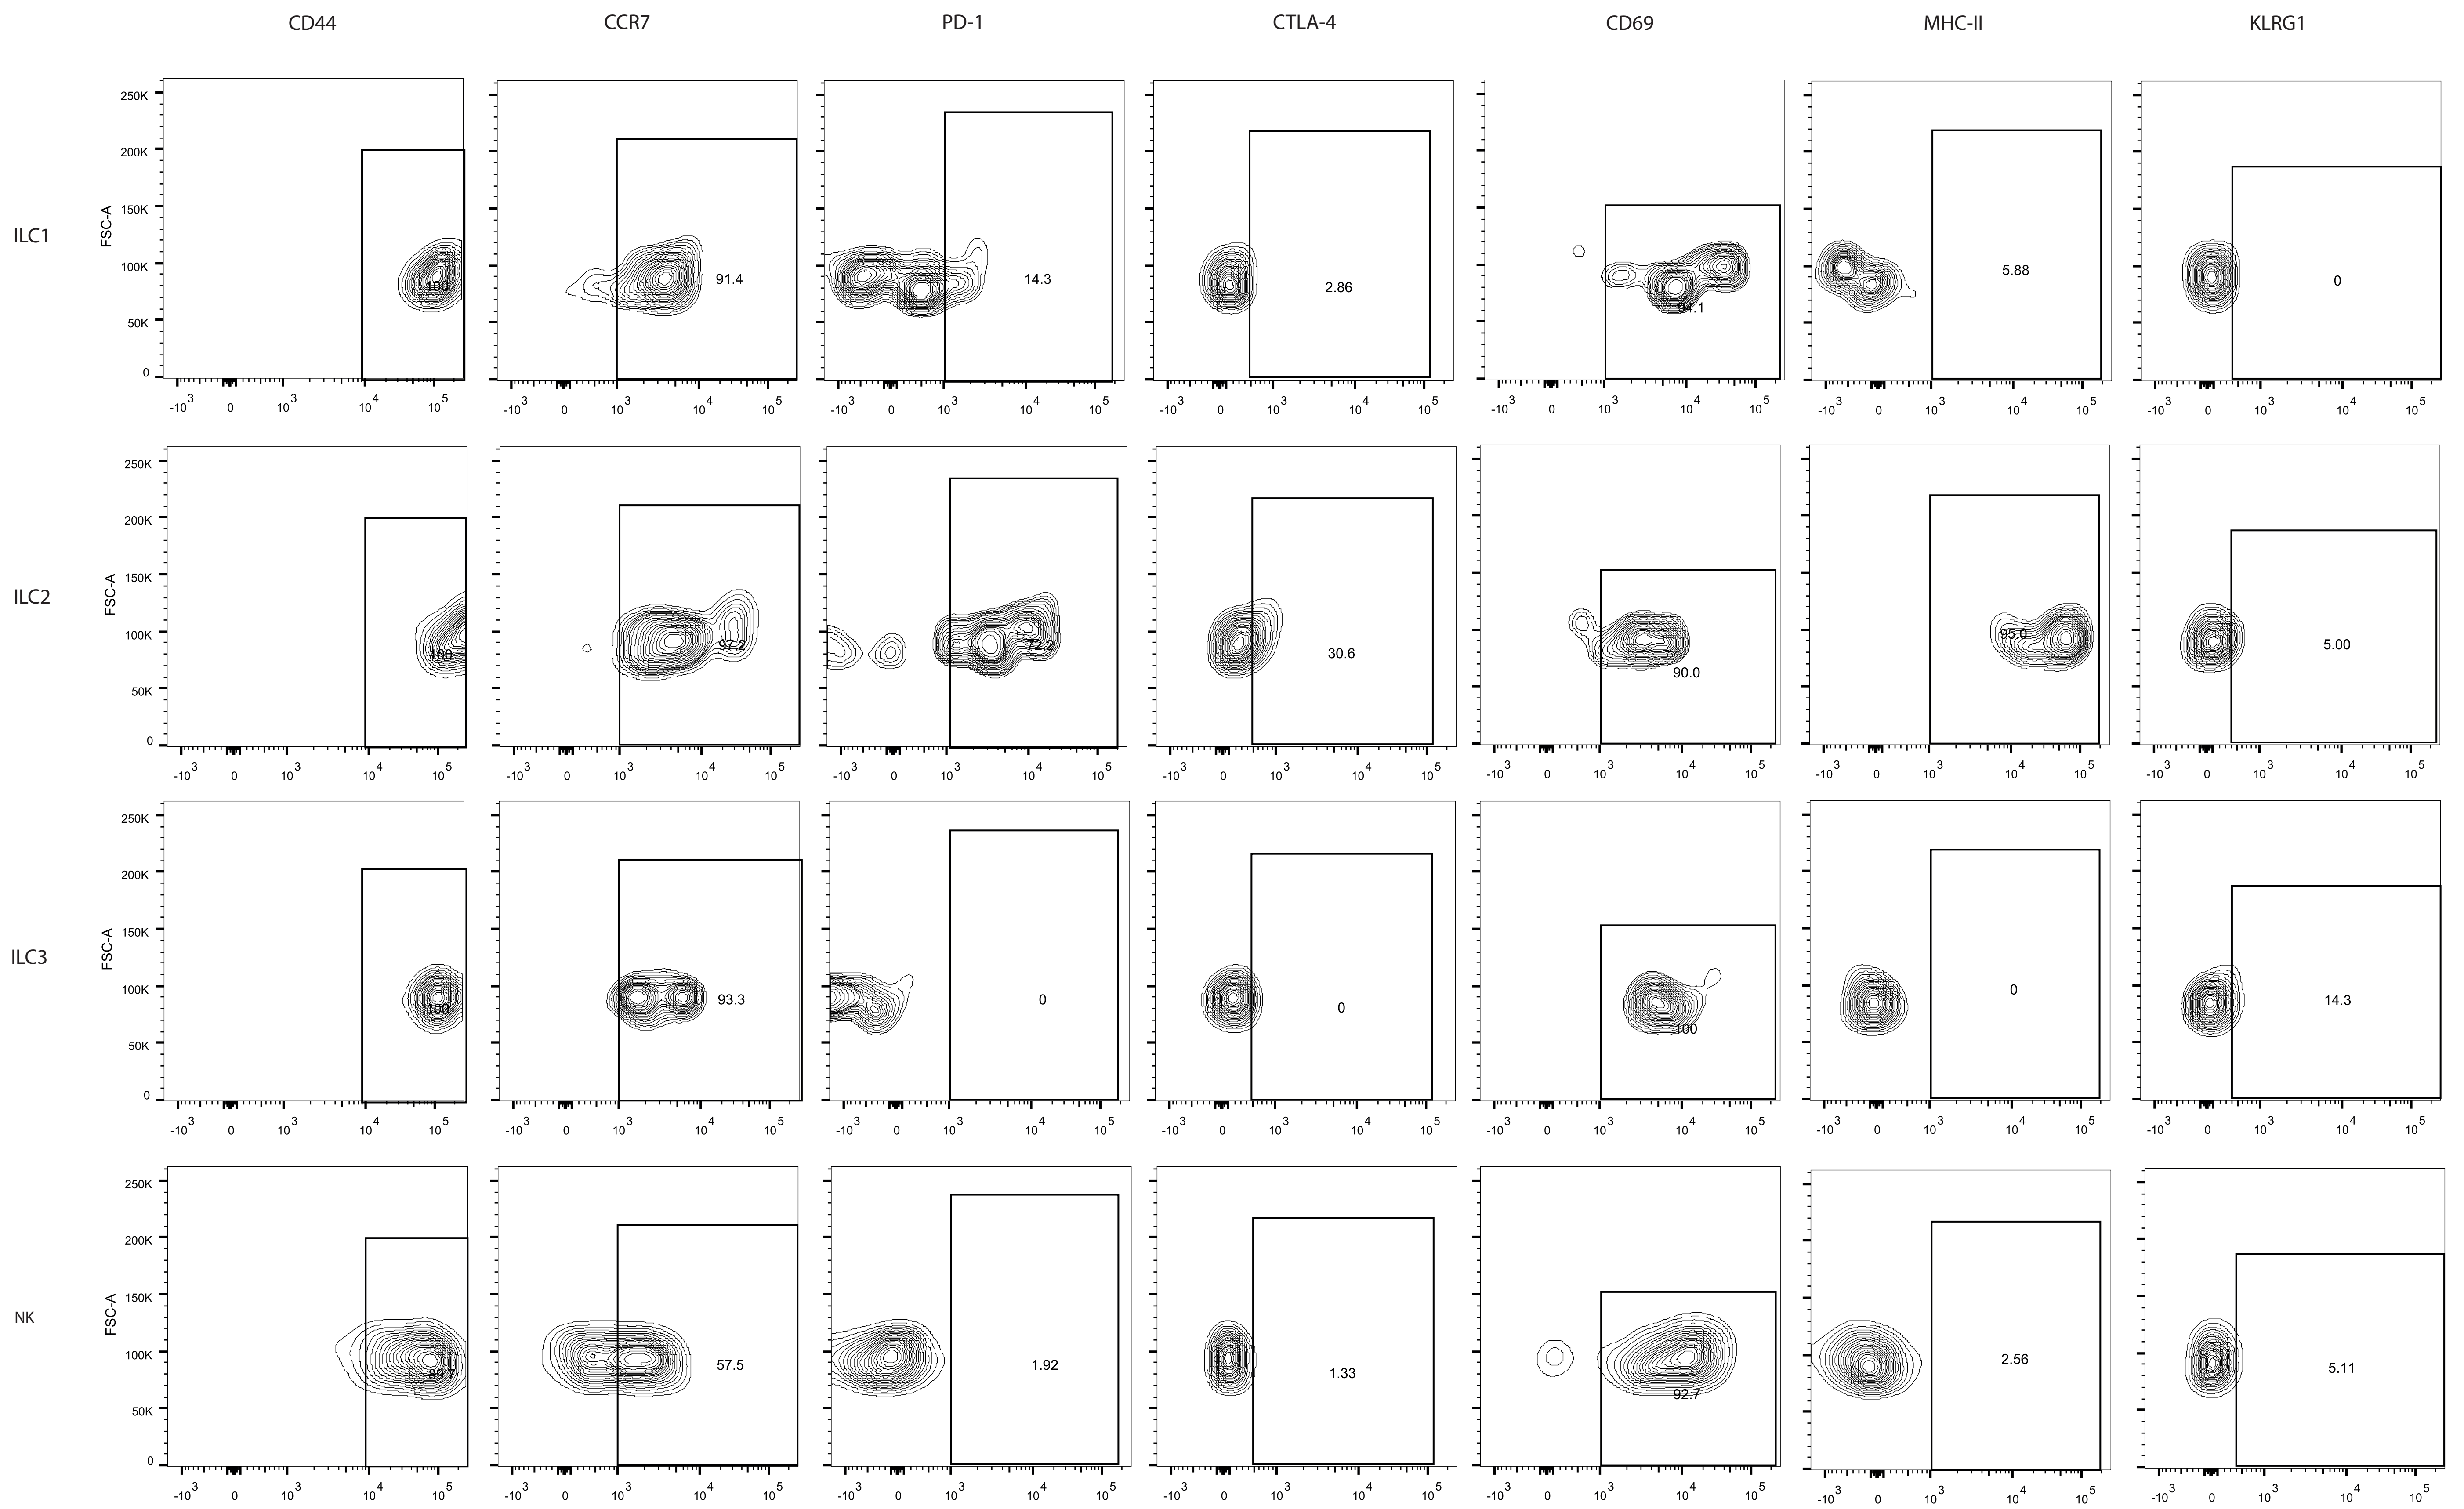

Supplemental Figure 5. Representative example of ILC1, ILC2, ILC3 phenotypic analysis from paralesional GI tumour tissue.

Table S1, patient characteristics

| <b>ID</b> | <b>Age</b> | <b>Diagnosis</b>                                                |
|-----------|------------|-----------------------------------------------------------------|
| 1         | 40         | bilateral breast fibroadenoma                                   |
| 2         | 48         | left breast malignant tumor (invasive ductal carcinoma)         |
| 3         | 63         | right breast invasive ductal carcinoma                          |
| 4         | 71         | esophagogastric junction malignant tumor                        |
| 5         | 42         | esophagogastric junction adenocarcinoma                         |
| 6         | 54         | left breast malignant tumor (invasive ductal carcinoma)         |
| 7         | 22         | bilateral breast fibroadenoma                                   |
| 8         | 42         | right breast invasive ductal carcinoma                          |
| 9         | 42         | right breast benign tumor (inflammatory lesion)                 |
| 10        | 47         | breast malignant tumor(invasive ductal carcinoma)               |
| 11        | 44         | breast invasive ductal carcinoma                                |
| 12        | 50         | breast invasive lobular carcinoma and lobular carcinoma in situ |
| 13        | 50         | left breast invasive ductal carcinoma                           |
| 14        | 44         | right breast malignant tumor(invasive Basal-Like)               |

|    |    |                                                                                     |
|----|----|-------------------------------------------------------------------------------------|
| 15 | 61 | sigmoid colon adenocarcinoma                                                        |
| 16 | 74 | gastric antrum malignant adenocarcinoma                                             |
| 17 | 55 | rectal malignant carcinoma                                                          |
| 18 | 44 | breast ductal carcinoma in situ                                                     |
| 19 | 79 | ascending colon adenocarcinoma                                                      |
| 20 | 53 | breast invasive ductal carcinoma                                                    |
| 21 | 41 | breast tumor (invasive ductal carcinoma)                                            |
| 22 | 65 | left breast invasive ductal carcinoma                                               |
| 23 | 74 | rectal carcinoma                                                                    |
| 24 | 47 | rectal carcinoma                                                                    |
| 25 | 47 | stomach malignant tumor (ulcerative adenocarcinoma of greater curvature of stomach) |
| 26 | 67 | left breast invasive ductal carcinoma                                               |
| 27 | 43 | right breast mastitis                                                               |
| 28 | 69 | rectum carcinoma                                                                    |
| 29 | 86 | cardiac tumor carcinoma                                                             |
| 30 | 66 | transverse colon malignant carcinoma                                                |
| 31 | 57 | rectal malignant tumor carcinoma                                                    |

|    |    |                                       |
|----|----|---------------------------------------|
| 32 | 41 | left breast invasive ductal carcinoma |
| 33 | 45 | left breast fibroadenoma              |
| 34 | 44 | left breast invasive ductal carcinoma |
